# Supplementary material for: Correlation of the molecular structure of host materials with lifetime and efficiency of blue phosphorescent organic light-emitting diodes
Source: Royal Society of Chemistry journal article supplement (doi:10.1039/c5cp03469h), 2015-01-01
Supplement: c5cp03469h1.pdf [file c5cp03469h1.pdf]

# **Correlation of molecular structure of host materials with lifetime and efficiency of blue phosphorescent organic light-emitting diodes**

**Ji Won Yang, Jun Yeob Lee\***

School of Chemical Engineering, Sungkyunkwan University  
2066, Seobu-ro, Jangan-gu, Suwon-si, Gyeonggi-do, 440-746, Korea

Fax: (+) 82-31-8005-3585

E-mail: [leej17@skku.edu](mailto:leej17@skku.edu)

\* To whom correspondence should be addressed

## Experimental

We used Shimadzu, Model UV-2501PC instrument for ultraviolet-visible (UV-vis) measurement. Tetrahydrofuran solution with a sample concentration of  $1 \times 10^{-5}$  M was used for the UV-vis measurement. We used fluorescence of F-7000 instrument of HITACHI for photoluminescence (PL) spectra. The same solution for UV-vis measurement was used in the solution PL measurement and the temperature of low temperature PL measurement was 77K. B09054 cyclic voltammetry of IVIUM Technology was used to measure electron affinity and ionic potential. Ag/AgCl, carbon and platinum wire electrodes were used as reference, working and counter electrodes, respectively. Electrolyte of the electrochemical measurements was 0.1 M tetrabutylammonium perchlorate solution in acetonitrile. Scan rate was 0.1 mV/s.

List of table

Table 1. Summarized photophysical data of the compounds.

Table 1. Summarized photophysical data of the compounds.

|                             | BCzDBT             | BCzDBF             | BCzBP              |
|-----------------------------|--------------------|--------------------|--------------------|
| Molar concentration (mol/L) | 0.00001            | 0.00001            | 0.00001            |
| Cell length (cm)            | 1                  | 1                  | 1                  |
| Absorbance                  | 0.887481           | 0.887256           | 0.743134           |
| Epsilon (1/cm·M)            | $8.87 \times 10^4$ | $8.87 \times 10^4$ | $7.43 \times 10^4$ |
| Lambda absorption (nm)      | 240                | 300                | 250                |
| Lambda emission (nm)        | 407                | 407                | 406                |

## List of figures

Figure S1.  $^1\text{H}$  NMR spectrum of BCzDBT.

Figure S2.  $^1\text{H}$  NMR spectrum of BCzDBF.

Figure S3.  $^1\text{H}$  NMR spectrum of BCzBP.

Figure S4.  $^{13}\text{C}$  NMR spectrum of BCzDBT.

Figure S5.  $^{13}\text{C}$  NMR spectrum of BCzDBF.

Figure S6.  $^{13}\text{C}$  NMR spectrum of BCzBP.

Figure S7. Mass spectrum of BCzDBT.

Figure S8. Mass spectrum of BCzDBF.

Figure S9. Mass spectrum of BCzBP.

Figure S10. Solution PL in THF and Toluene of BCzDBT.

Figure S11. Solution PL in THF and Toluene of BCzDBF.

Figure S12. Solution PL in THF and Toluene of BCzBP.

Figure S13. The Cartesian coordinates (x,y,z) of BCzDBT

Figure S14. The Cartesian coordinates (x,y,z) of BCzDBF

Figure S15. The Cartesian coordinates (x,y,z) of BCzBP.

Figure S1

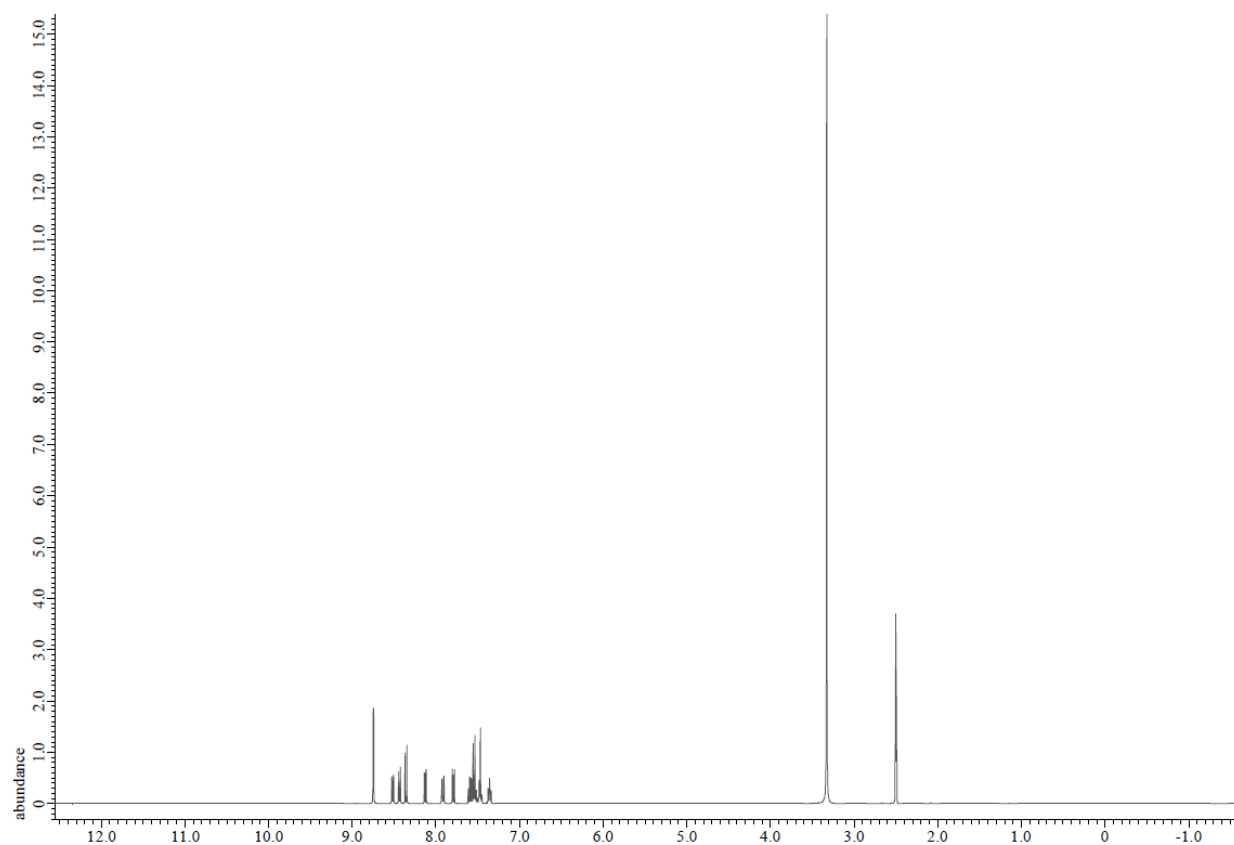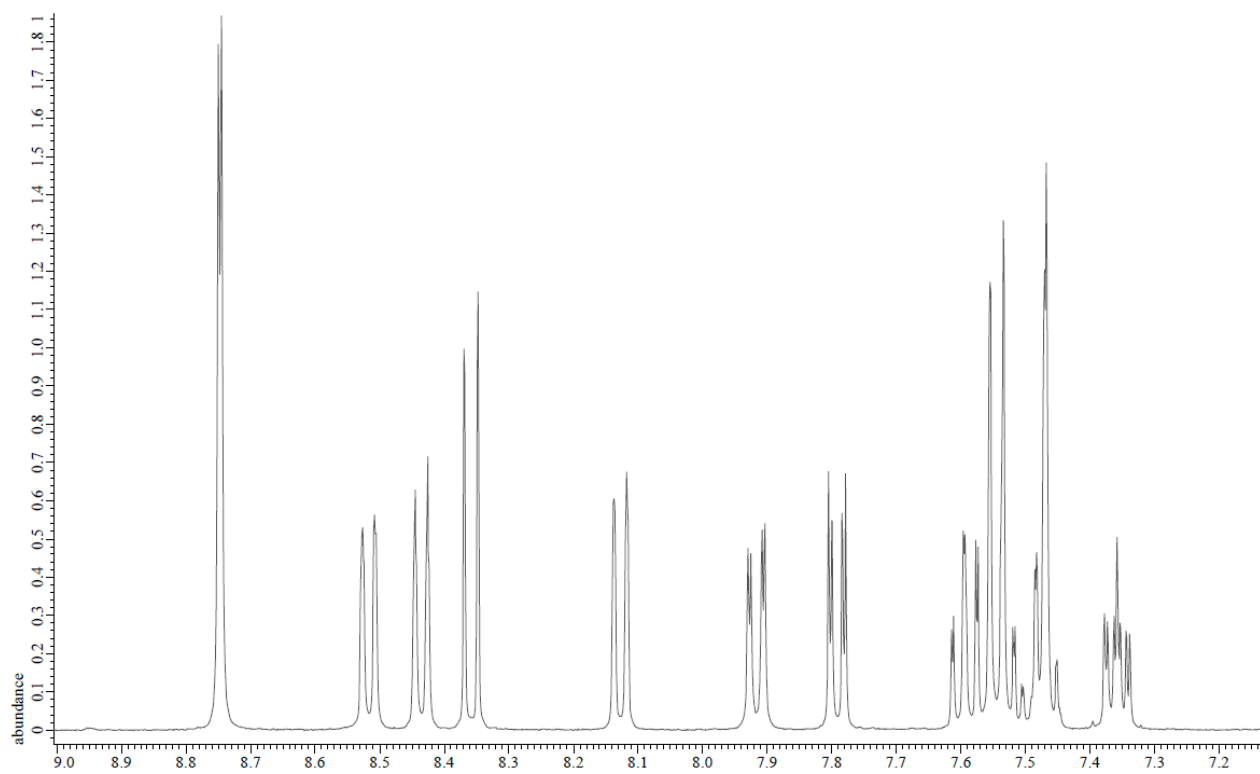

Figure S2

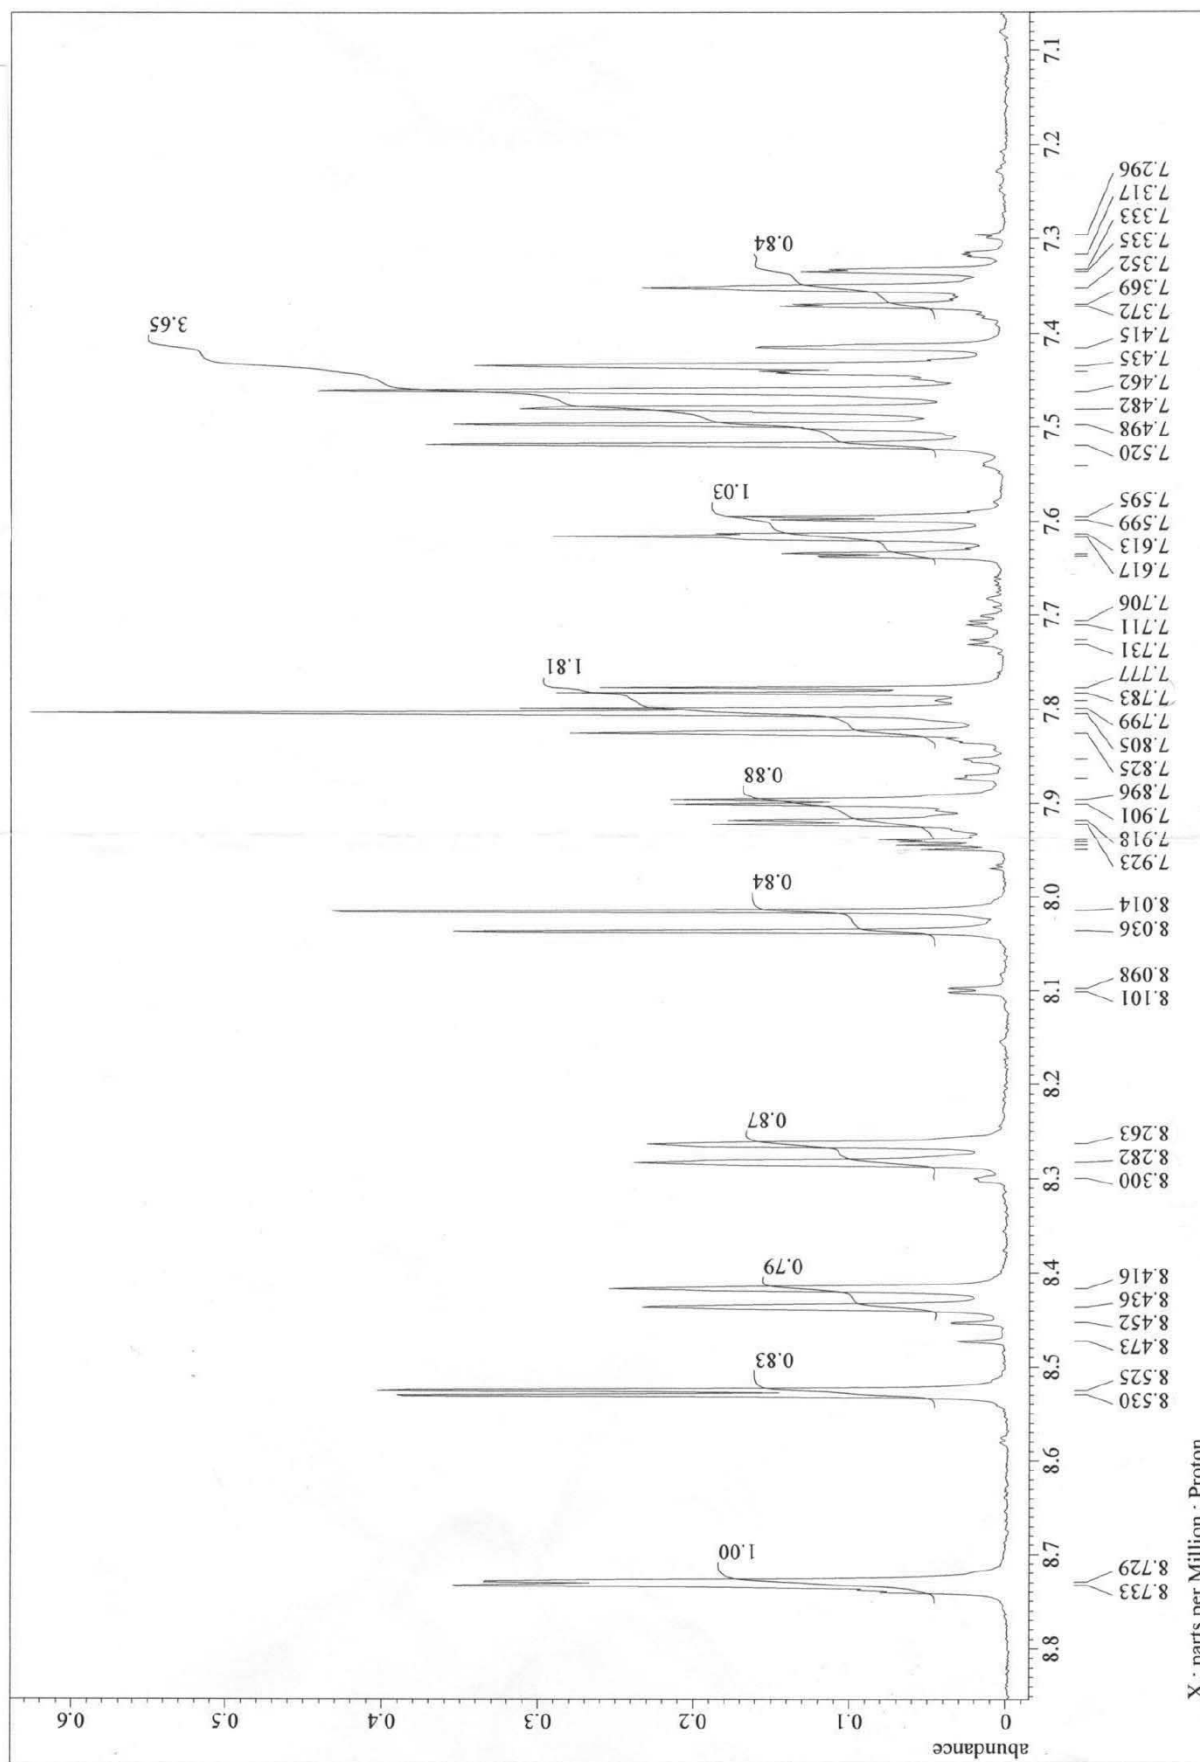

Figure S3

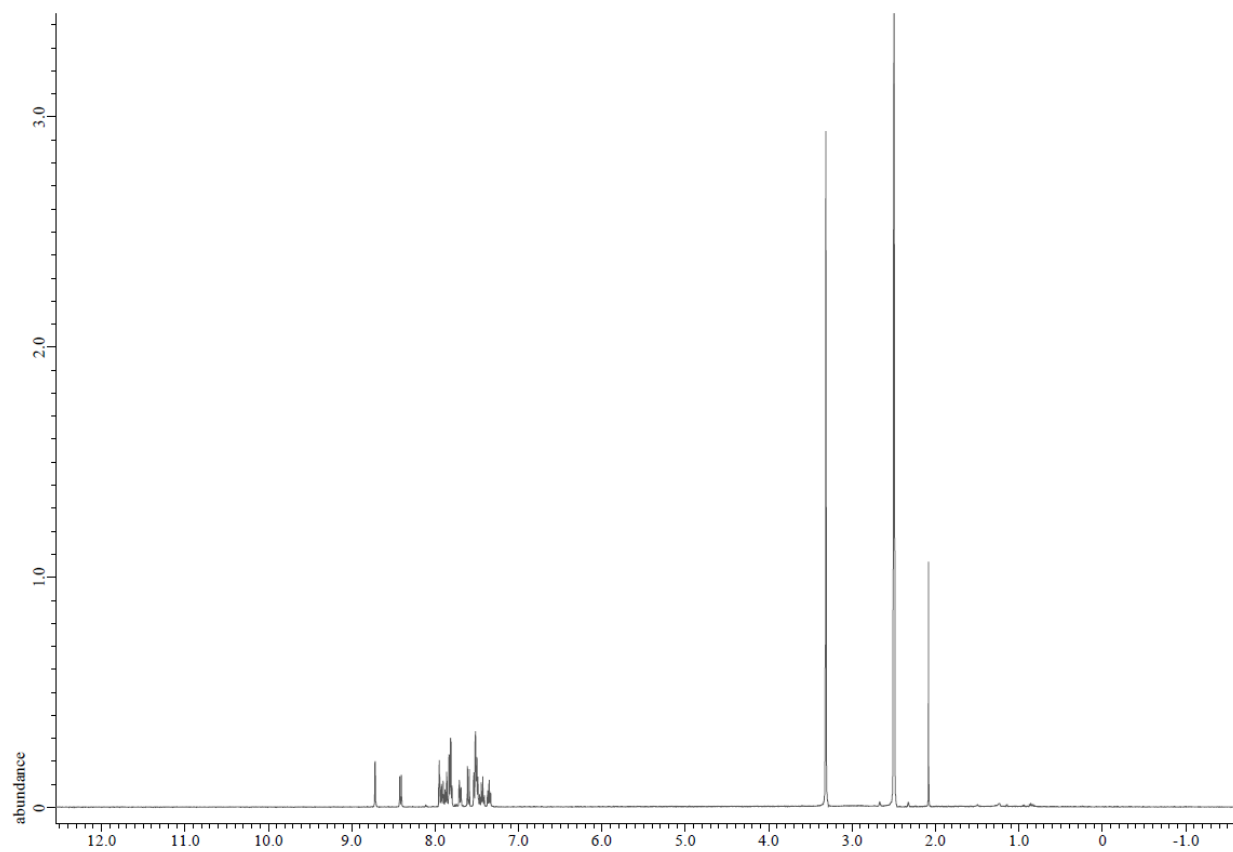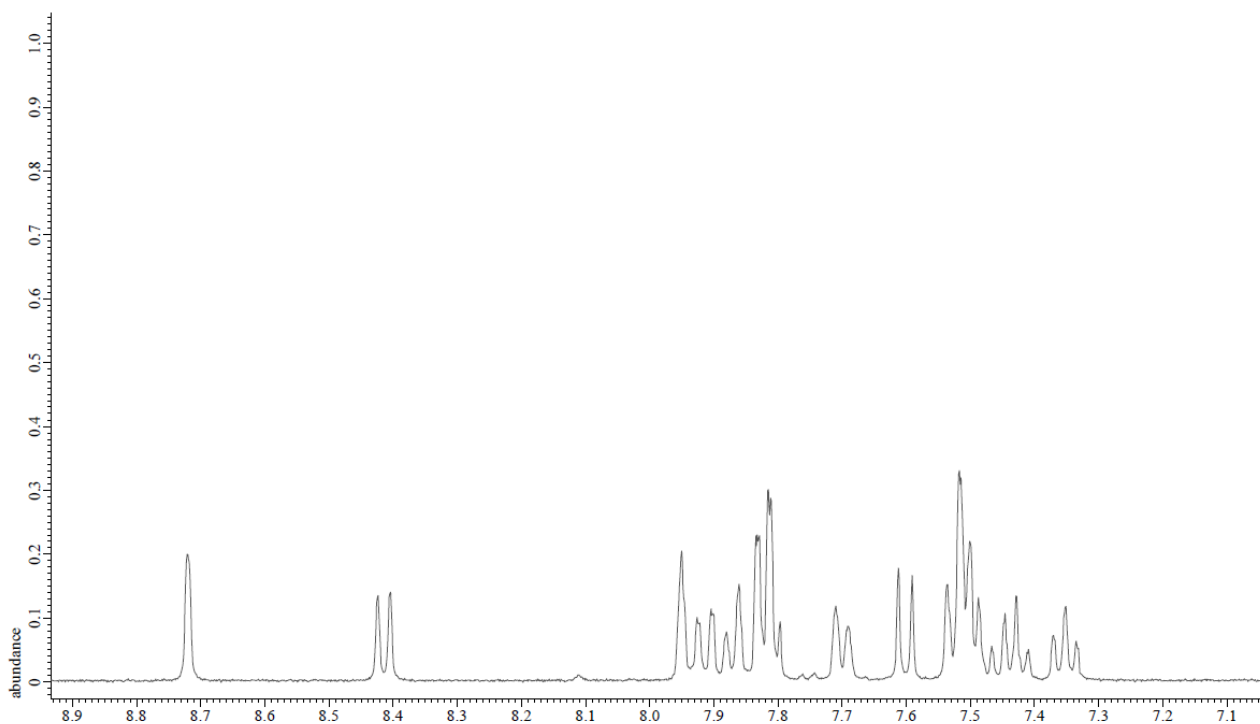



Figure S4

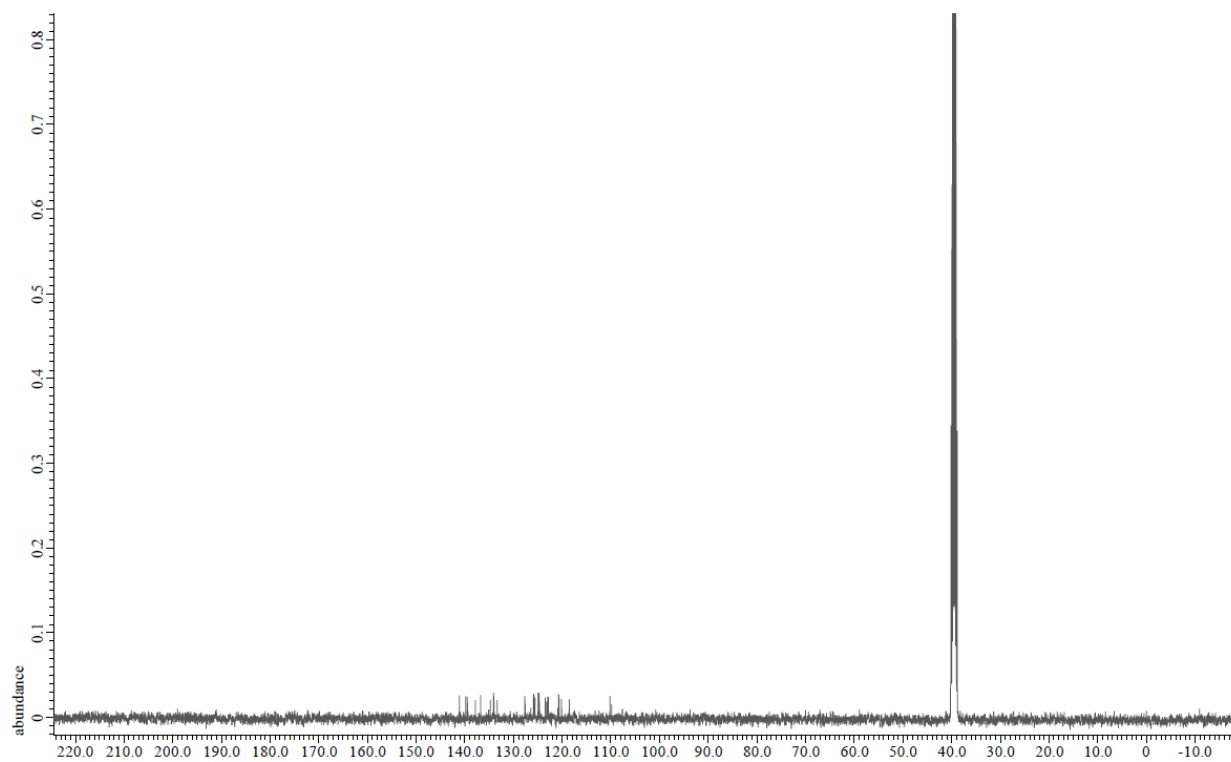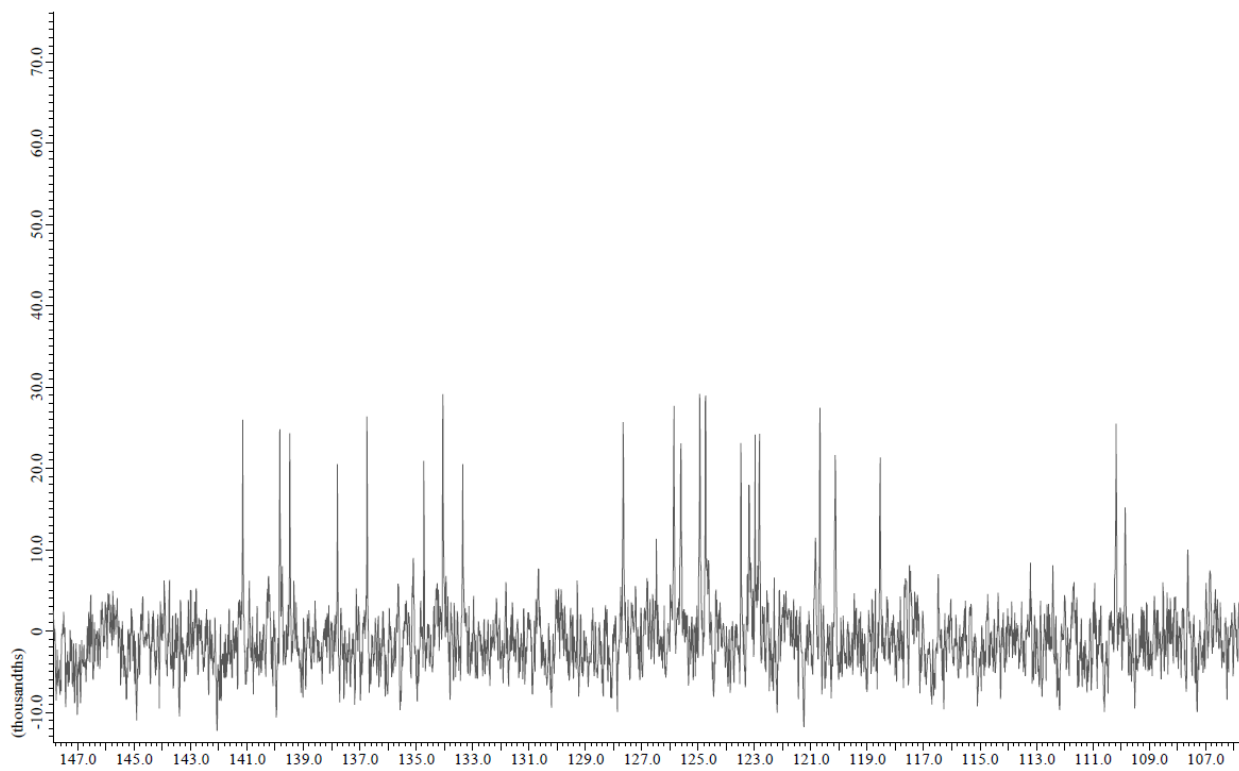

Figure S5

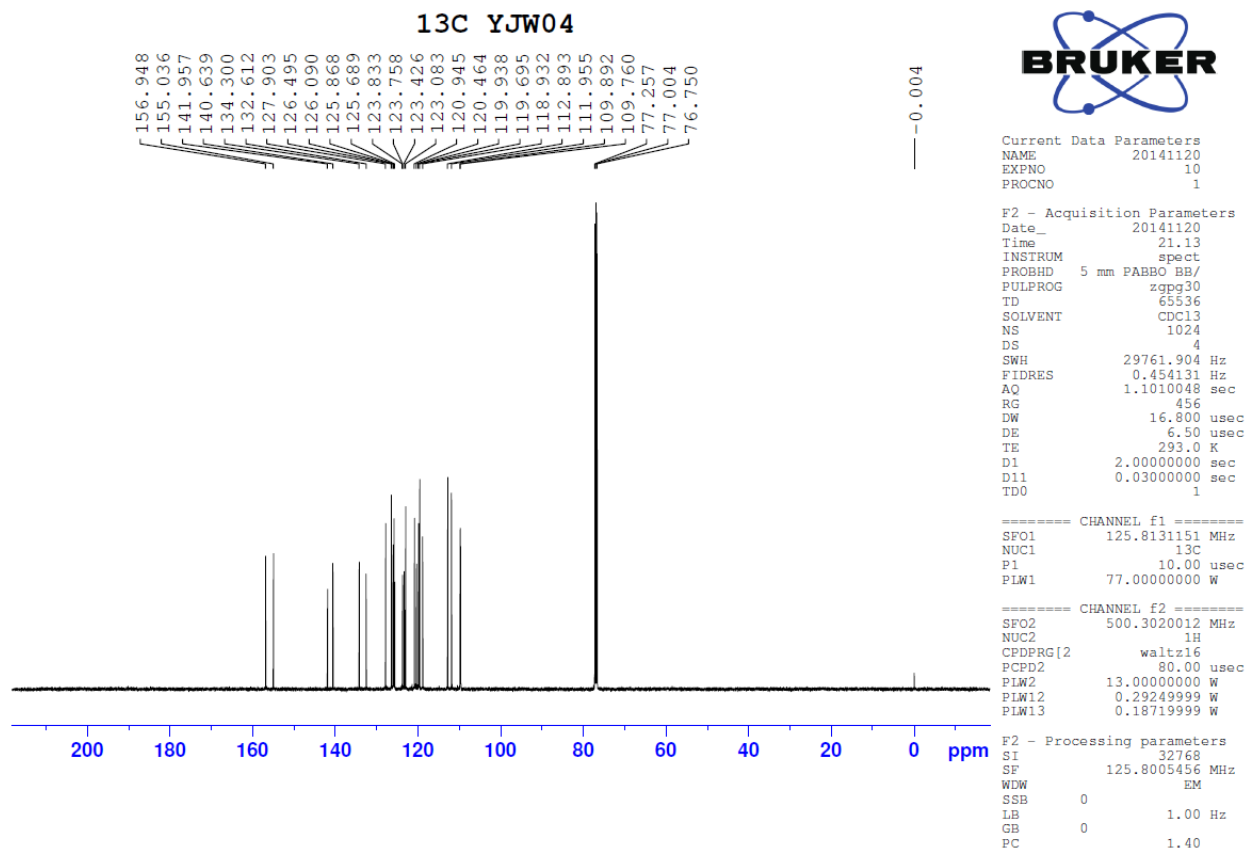

Figure S6

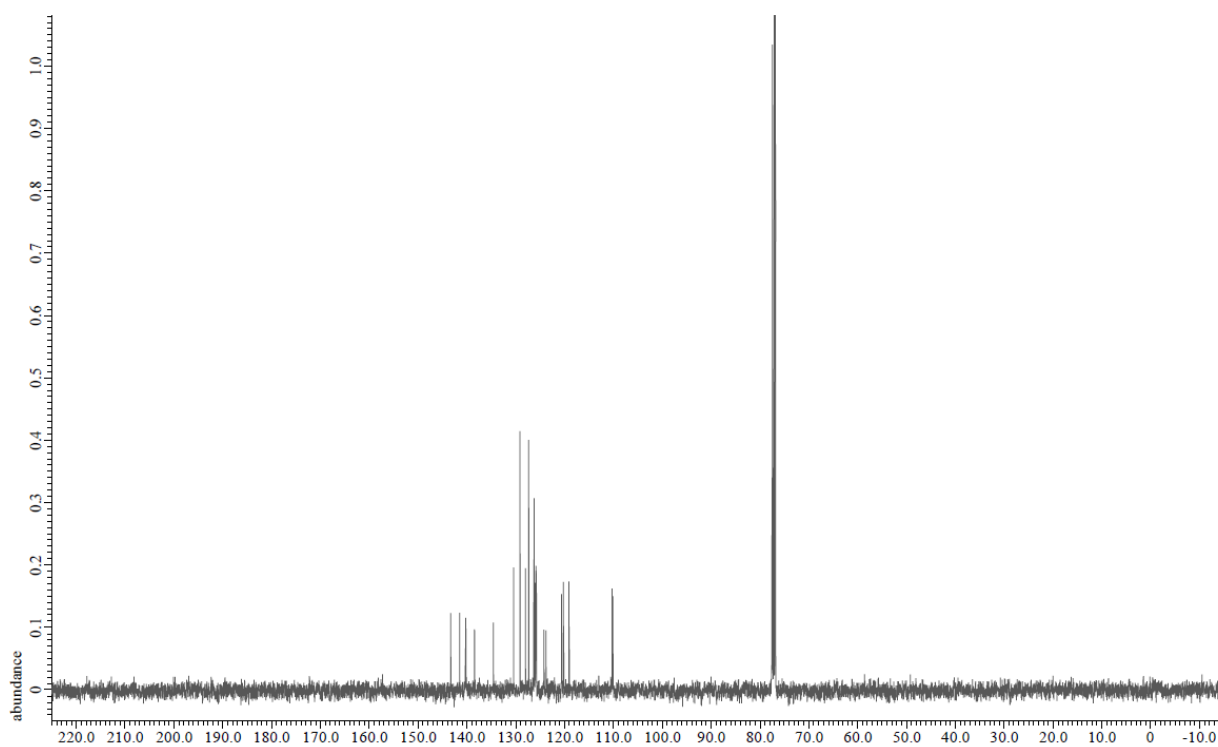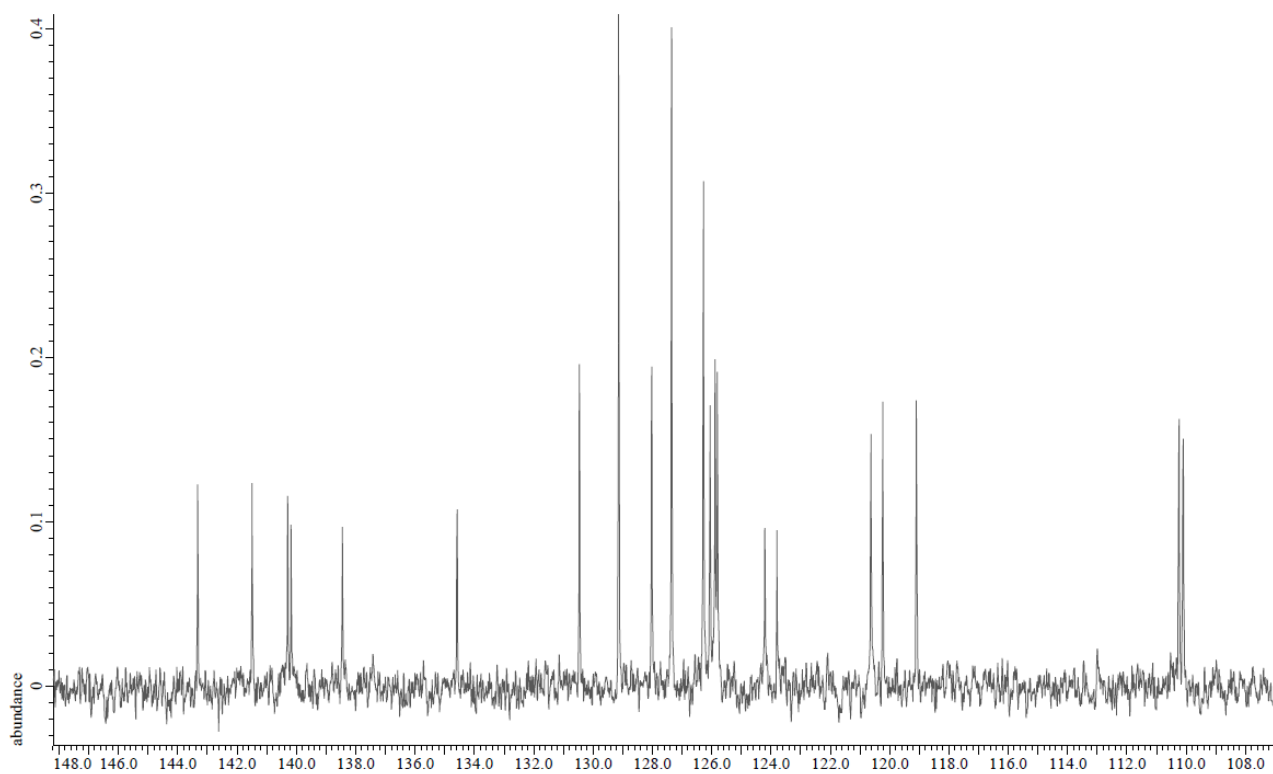

Figure S7

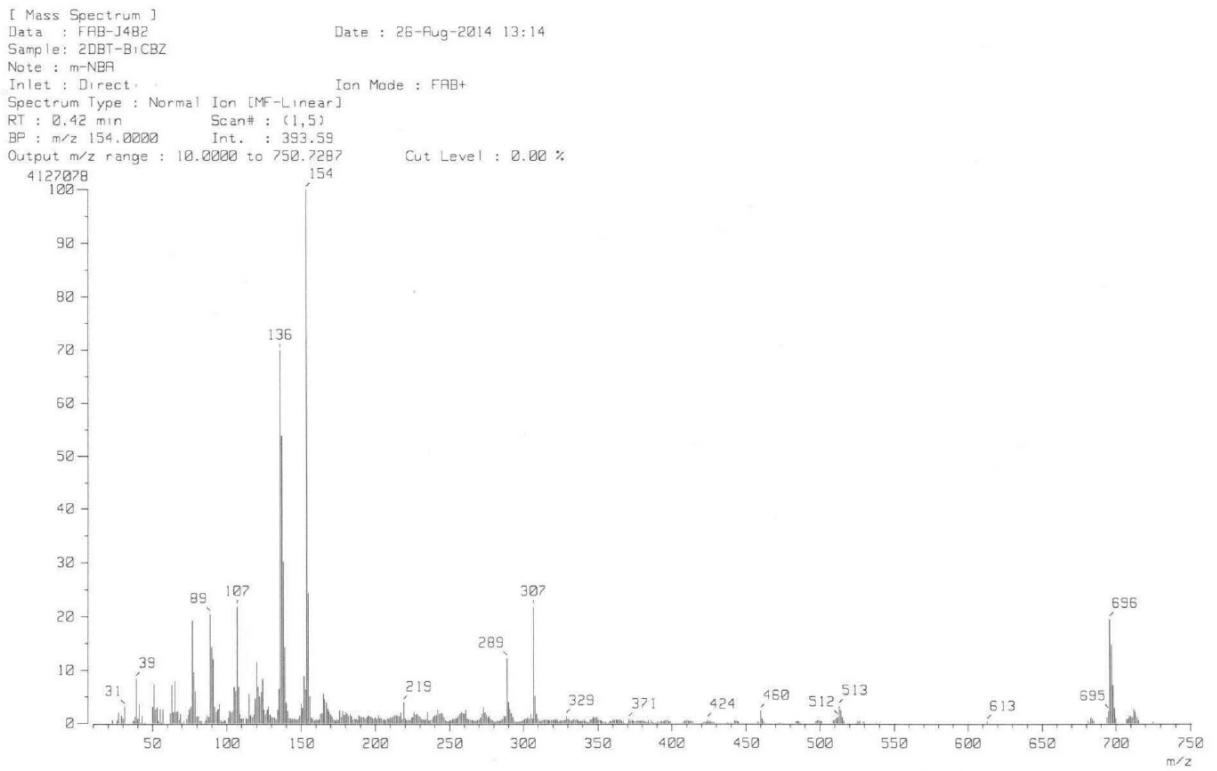

Figure S8

Spectrum RT 7.59 - 7.64 (8 scans) - Background Subtracted 1.72 - 3.29  
yiw04 2015.07.28 15:39:37 ;  
APCI + Max: 6.6E5

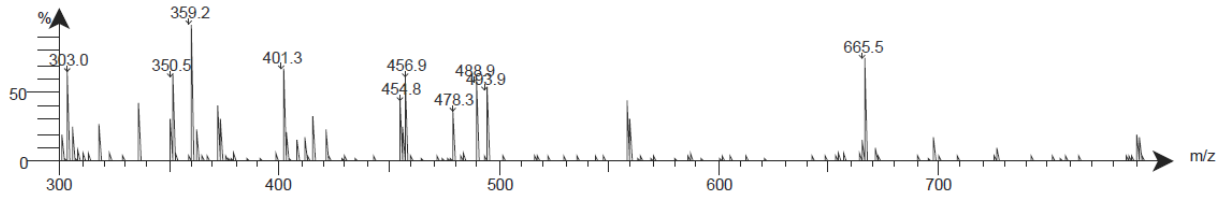

Figure S9

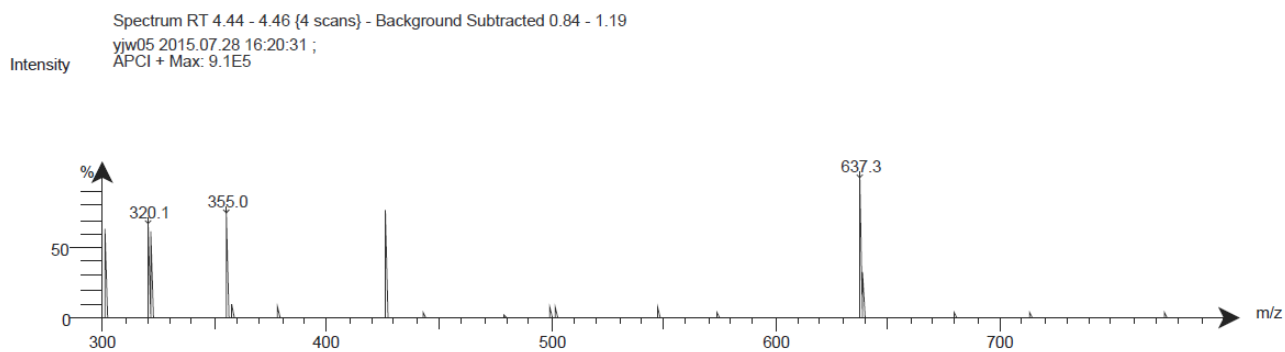

Figure S10

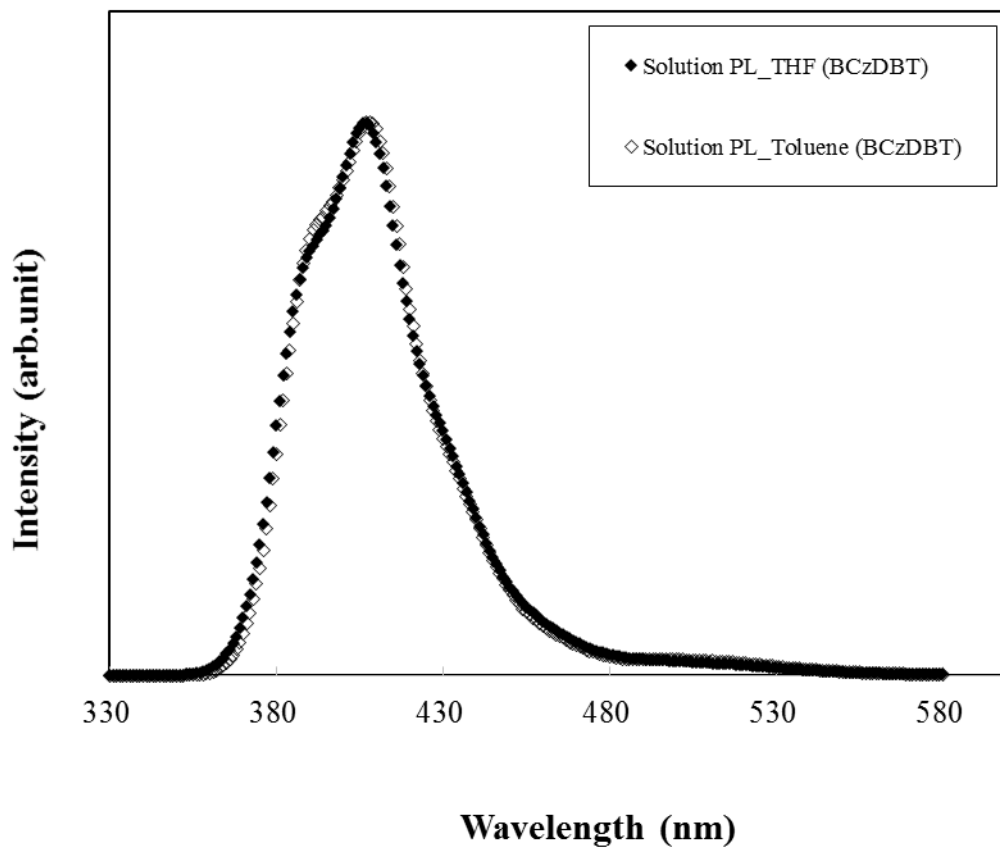

Figure S11

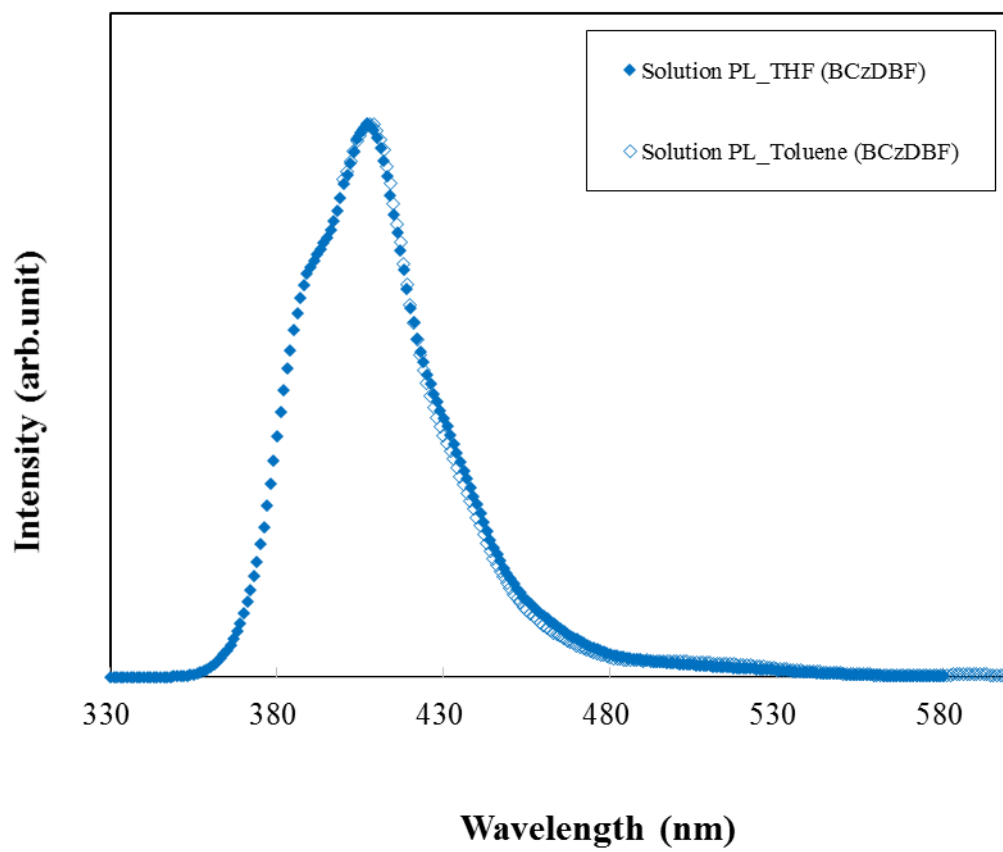



Figure S12

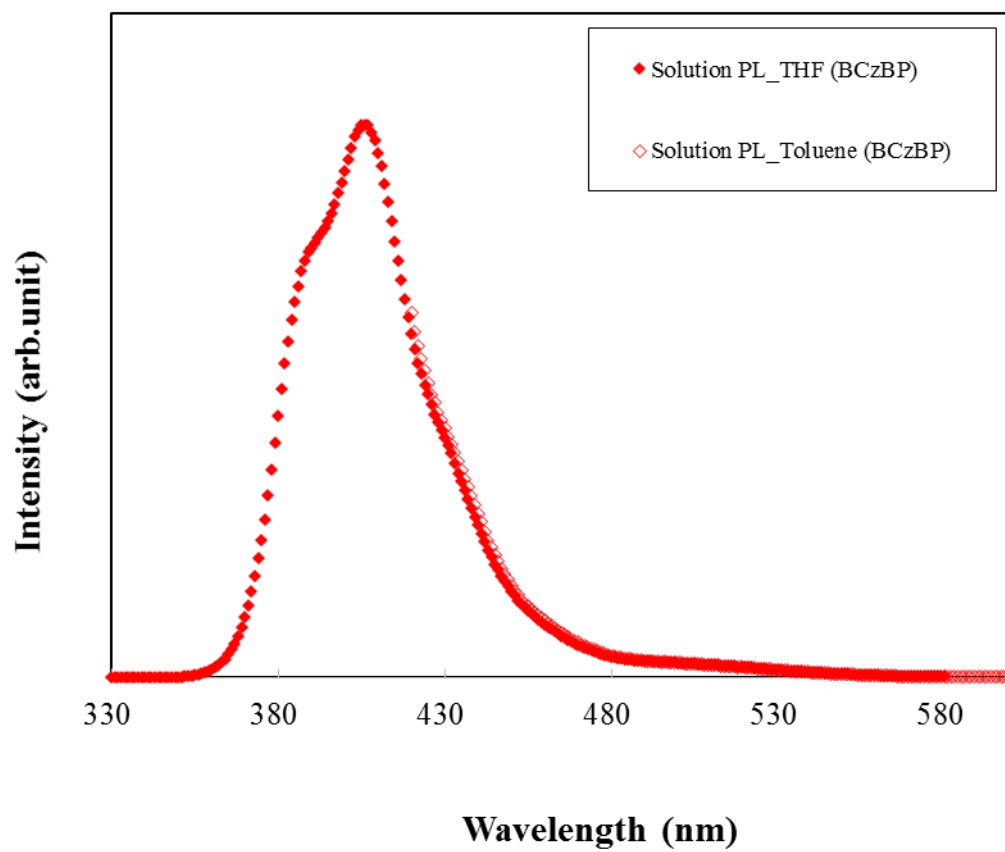

Figure S13

|   |              |              |              |
|---|--------------|--------------|--------------|
| C | -3.855249000 | -3.404341000 | -0.693274000 |
| C | -3.813045000 | -4.802898000 | -0.727203000 |
| C | -5.001512000 | -5.514588000 | -0.863588000 |
| C | -6.231306000 | -4.840780000 | -0.958988000 |
| C | -6.301872000 | -3.449505000 | -0.928453000 |
| C | -5.103872000 | -2.740569000 | -0.804841000 |
| N | -4.892621000 | -1.358435000 | -0.733349000 |
| C | -5.898401000 | -0.357962000 | -0.815249000 |
| C | -6.740655000 | -0.305400000 | -1.942594000 |
| C | -7.734656000 | 0.661920000  | -2.039710000 |
| C | -7.870805000 | 1.595421000  | -1.009903000 |
| C | -7.027531000 | 1.564838000  | 0.123757000  |
| C | -7.344730000 | 2.621411000  | 1.072264000  |
| C | -6.739474000 | 2.914894000  | 2.303704000  |
| C | -7.201778000 | 3.983711000  | 3.062932000  |
| C | -8.269745000 | 4.772849000  | 2.607836000  |
| C | -8.886666000 | 4.501504000  | 1.389328000  |
| C | -8.418899000 | 3.426476000  | 0.630506000  |
| S | -9.051544000 | 2.906460000  | -0.936945000 |
| C | -6.045479000 | 0.569451000  | 0.215848000  |
| C | -3.521090000 | -1.130949000 | -0.575949000 |
| C | -2.845307000 | -2.376178000 | -0.545056000 |
| C | -1.454675000 | -2.407367000 | -0.412193000 |
| C | -0.729252000 | -1.213460000 | -0.309464000 |
| C | 0.748472000  | -1.229931000 | -0.156141000 |
| C | 1.551788000  | -0.270656000 | -0.817171000 |
| C | 2.937631000  | -0.249203000 | -0.699707000 |
| C | 3.541423000  | -1.218489000 | 0.104832000  |
| C | 2.768815000  | -2.203310000 | 0.769050000  |
| C | 3.699092000  | -3.052344000 | 1.485192000  |
| C | 3.546600000  | -4.166923000 | 2.317907000  |
| C | 4.677323000  | -4.757611000 | 2.874811000  |
| C | 5.957448000  | -4.240202000 | 2.611801000  |
| C | 6.137836000  | -3.132183000 | 1.786363000  |
| C | 4.999606000  | -2.551220000 | 1.220870000  |
| N | 4.895476000  | -1.436305000 | 0.380770000  |
| C | 5.979428000  | -0.654489000 | -0.102759000 |
| C | 7.003848000  | -1.267309000 | -0.849681000 |
| C | 8.075279000  | -0.520942000 | -1.327667000 |
| C | 6.022919000  | 0.714491000  | 0.159255000  |
| C | 7.084382000  | 1.485373000  | -0.333084000 |
| C | 8.108741000  | 0.851678000  | -1.072299000 |
| S | 9.362300000  | 1.981517000  | -1.592427000 |
| C | 8.515577000  | 3.323826000  | -0.812240000 |
| C | 8.933204000  | 4.656238000  | -0.789375000 |
| C | 8.141960000  | 5.589129000  | -0.124053000 |
| C | 6.951347000  | 5.199170000  | 0.509020000  |
| C | 6.539463000  | 3.871692000  | 0.482860000  |
| C | 7.319860000  | 2.912942000  | -0.181061000 |
| C | 1.377541000  | -2.197226000 | 0.638041000  |
| C | -1.434772000 | 0.012176000  | -0.355658000 |
| C | -2.817892000 | 0.073031000  | -0.491491000 |
| H | -2.863746000 | -5.325770000 | -0.644077000 |
| H | -4.980880000 | -6.600277000 | -0.892615000 |
| H | -7.149290000 | -5.414219000 | -1.055785000 |
| H | -7.255961000 | -2.936697000 | -0.993137000 |
| H | -6.598843000 | -1.024817000 | -2.742540000 |
| H | -8.381456000 | 0.695007000  | -2.911333000 |
| H | -5.912119000 | 2.308272000  | 2.662096000  |
| H | -6.732916000 | 4.210119000  | 4.016166000  |
| H | -8.621308000 | 5.605135000  | 3.211137000  |

|   |              |              |              |             |              |
|---|--------------|--------------|--------------|-------------|--------------|
| H | -9.713224000 | 5.112335000  | 1.038320000  |             |              |
| H | -5.401299000 | 0.504944000  | 1.087276000  |             |              |
| H | -0.929540000 | -3.358605000 | -0.417756000 |             |              |
| H | 1.071688000  | 0.458886000  | -1.462995000 |             |              |
| H | 3.527531000  | 0.489208000  | -1.232978000 |             |              |
| H | 2.556649000  | -4.562539000 | 2.529924000  |             |              |
| H | 4.571311000  | -5.623642000 | 3.521927000  |             |              |
| H | 6.827251000  | -4.710207000 | 3.062845000  |             |              |
| H | 7.128301000  | -2.732124000 | 1.595468000  |             |              |
| H | 6.942539000  | -2.330573000 | -1.057865000 |             |              |
| H | 8.862276000  | -1.000671000 | -1.901822000 |             |              |
| H | 5.235231000  | 1.169983000  | 0.751320000  |             |              |
| H | 9.854353000  | 4.959281000  | -1.278410000 |             |              |
| H | 8.452210000  | 6.629912000  | -0.096138000 |             |              |
| H | 6.347081000  | 5.940816000  | 1.023379000  |             |              |
| H | 5.616638000  | 3.576155000  | 0.974891000  |             |              |
| H | 0.778432000  | -2.931391000 | 1.169824000  |             |              |
| H | -0.879141000 | 0.940427000  | -0.258492000 |             |              |
| H |              | -3.329381000 |              | 1.029504000 | -0.524557000 |

Figure S14

|   |              |              |              |
|---|--------------|--------------|--------------|
| C | -3.700678000 | -2.926298000 | 1.440442000  |
| C | -3.550031000 | -4.051716000 | 2.258860000  |
| C | -4.682008000 | -4.650017000 | 2.805055000  |
| C | -5.961830000 | -4.130122000 | 2.544992000  |
| C | -6.140540000 | -3.011565000 | 1.733589000  |
| C | -5.000939000 | -2.422059000 | 1.179833000  |
| N | -4.895793000 | -1.297668000 | 0.353645000  |
| C | -5.980056000 | -0.510036000 | -0.123948000 |
| C | -6.981581000 | -1.115276000 | -0.909463000 |
| C | -8.064455000 | -0.381497000 | -1.391727000 |
| C | -8.096638000 | 0.970916000  | -1.081979000 |
| C | -7.105140000 | 1.606160000  | -0.309934000 |
| C | -7.516936000 | 2.995813000  | -0.222151000 |
| C | -7.009510000 | 4.153153000  | 0.379530000  |
| C | -7.716768000 | 5.344929000  | 0.233048000  |
| C | -8.914031000 | 5.391883000  | -0.501140000 |
| C | -9.438663000 | 4.250245000  | -1.109614000 |
| C | -8.718739000 | 3.074512000  | -0.951011000 |
| O | -9.076341000 | 1.851363000  | -1.475404000 |
| C | -6.037991000 | 0.852155000  | 0.185788000  |
| C | -3.541927000 | -1.075778000 | 0.082989000  |
| C | -2.769520000 | -2.067901000 | 0.736776000  |
| C | -1.377859000 | -2.057408000 | 0.609729000  |
| C | -0.748430000 | -1.078029000 | -0.169231000 |
| C | 0.729822000  | -1.056787000 | -0.317297000 |
| C | 1.433898000  | 0.170513000  | -0.337667000 |
| C | 2.817472000  | 0.235371000  | -0.466580000 |
| C | 3.522042000  | -0.966145000 | -0.571464000 |
| C | 2.848078000  | -2.212921000 | -0.565730000 |
| C | 3.860842000  | -3.236358000 | -0.726792000 |
| C | 3.822561000  | -4.634175000 | -0.787837000 |
| C | 5.013562000  | -5.340125000 | -0.932097000 |
| C | 6.242162000  | -4.661616000 | -1.009510000 |
| C | 6.309023000  | -3.271047000 | -0.952102000 |
| C | 5.108725000  | -2.567802000 | -0.819166000 |
| N | 4.894114000  | -1.188267000 | -0.725048000 |
| C | 5.899924000  | -0.183579000 | -0.777397000 |
| C | 6.721039000  | -0.085542000 | -1.918717000 |
| C | 7.724365000  | 0.878311000  | -2.007432000 |
| C | 6.060849000  | 0.694955000  | 0.298367000  |
| C | 7.047127000  | 1.681539000  | 0.214451000  |
| C | 7.860017000  | 1.746669000  | -0.933372000 |
| O | 8.783525000  | 2.761136000  | -0.845369000 |
| C | 8.570211000  | 3.362254000  | 0.376208000  |
| C | 9.291684000  | 4.439803000  | 0.870290000  |
| C | 8.926623000  | 4.910837000  | 2.132705000  |
| C | 7.880209000  | 4.318525000  | 2.860003000  |
| C | 7.168382000  | 3.237025000  | 2.344595000  |
| C | 7.517296000  | 2.748091000  | 1.080428000  |
| C | 1.456906000  | -2.247904000 | -0.438867000 |
| C | -1.551480000 | -0.110787000 | -0.818974000 |
| C | -2.937734000 | -0.093769000 | -0.705583000 |
| H | -2.560539000 | -4.450075000 | 2.467954000  |
| H | -4.577320000 | -5.524435000 | 3.441039000  |
| H | -6.832596000 | -4.606943000 | 2.986997000  |
| H | -7.130629000 | -2.610112000 | 1.543357000  |
| H | -6.894579000 | -2.171165000 | -1.143941000 |
| H | -8.841002000 | -0.840164000 | -1.994392000 |
| H | -6.084618000 | 4.124259000  | 0.948706000  |
| H | -7.338136000 | 6.253052000  | 0.693021000  |
| H | -9.444092000 | 6.335021000  | -0.598451000 |

|   |               |              |              |             |              |
|---|---------------|--------------|--------------|-------------|--------------|
| H | -10.361739000 | 4.271906000  | -1.679087000 |             |              |
| H | -5.266766000  | 1.299129000  | 0.805045000  |             |              |
| H | -0.778554000  | -2.797267000 | 1.133394000  |             |              |
| H | 0.876445000   | 1.095954000  | -0.224979000 |             |              |
| H | 3.329093000   | 1.192382000  | -0.477768000 |             |              |
| H | 2.874240000   | -5.161049000 | -0.719950000 |             |              |
| H | 4.995820000   | -6.425122000 | -0.982037000 |             |              |
| H | 7.161879000   | -5.230979000 | -1.113890000 |             |              |
| H | 7.261563000   | -2.753839000 | -1.004724000 |             |              |
| H | 6.556291000   | -0.773688000 | -2.741357000 |             |              |
| H | 8.362646000   | 0.958333000  | -2.880821000 |             |              |
| H | 5.431049000   | 0.595639000  | 1.176755000  |             |              |
| H | 10.097389000  | 4.886909000  | 0.297780000  |             |              |
| H | 9.464136000   | 5.752608000  | 2.559833000  |             |              |
| H | 7.623538000   | 4.711346000  | 3.839515000  |             |              |
| H | 6.360649000   | 2.784175000  | 2.912702000  |             |              |
| H | 0.932565000   | -3.199318000 | -0.462919000 |             |              |
| H | -1.070447000  | 0.629043000  | -1.452320000 |             |              |
| H |               | -3.528036000 |              | 0.651549000 | -1.228831000 |

Figure S15

|   |               |              |              |
|---|---------------|--------------|--------------|
| C | 3.961376000   | 2.443014000  | -0.692728000 |
| C | 3.979515000   | 3.840461000  | -0.617058000 |
| C | 5.201964000   | 4.505652000  | -0.640729000 |
| C | 6.404739000   | 3.786226000  | -0.746505000 |
| C | 6.415137000   | 2.394957000  | -0.822387000 |
| C | 5.185388000   | 1.731966000  | -0.784699000 |
| N | 4.910705000   | 0.361316000  | -0.863345000 |
| C | 5.875467000   | -0.676989000 | -0.965703000 |
| C | 5.813958000   | -1.591114000 | -2.024313000 |
| C | 6.758020000   | -2.614269000 | -2.099278000 |
| C | 7.767405000   | -2.720415000 | -1.144078000 |
| C | 7.846403000   | -1.807019000 | -0.079217000 |
| C | 8.913390000   | -1.917678000 | 0.949007000  |
| C | 9.353493000   | -3.173664000 | 1.399668000  |
| C | 10.355212000  | -3.278116000 | 2.363478000  |
| C | 10.938459000  | -2.128355000 | 2.898905000  |
| C | 10.510540000  | -0.873443000 | 2.461952000  |
| C | 9.509415000   | -0.769660000 | 1.497497000  |
| C | 6.880366000   | -0.792053000 | 0.000090000  |
| C | 3.522844000   | 0.188287000  | -0.821506000 |
| C | 2.900630000   | 1.456521000  | -0.711086000 |
| C | 1.507524000   | 1.542136000  | -0.642323000 |
| C | 0.727919000   | 0.378972000  | -0.670597000 |
| C | -0.753975000  | 0.452323000  | -0.593228000 |
| C | -1.559045000  | -0.413984000 | -1.370081000 |
| C | -2.949042000  | -0.375190000 | -1.332832000 |
| C | -3.555494000  | 0.565965000  | -0.497466000 |
| C | -2.779500000  | 1.439931000  | 0.303793000  |
| C | -3.710646000  | 2.243597000  | 1.069311000  |
| C | -3.555848000  | 3.270796000  | 2.007325000  |
| C | -4.688539000  | 3.867564000  | 2.553492000  |
| C | -5.973374000  | 3.451767000  | 2.163910000  |
| C | -6.155691000  | 2.430978000  | 1.233163000  |
| C | -5.014746000  | 1.825602000  | 0.699422000  |
| N | -4.912443000  | 0.805448000  | -0.253935000 |
| C | -5.999859000  | 0.120081000  | -0.859979000 |
| C | -6.947728000  | -0.526928000 | -0.060738000 |
| C | -8.032194000  | -1.208609000 | -0.634194000 |
| C | -9.037983000  | -1.888653000 | 0.222626000  |
| C | -9.451140000  | -1.322149000 | 1.440169000  |
| C | -10.395140000 | -1.960040000 | 2.243376000  |
| C | -10.947756000 | -3.178891000 | 1.845905000  |
| C | -10.546723000 | -3.754310000 | 0.638902000  |
| C | -9.601835000  | -3.116506000 | -0.163298000 |
| C | -8.131930000  | -1.242789000 | -2.035444000 |
| C | -7.179938000  | -0.609917000 | -2.832610000 |
| C | -6.116339000  | 0.081842000  | -2.254609000 |
| C | -1.384713000  | 1.376564000  | 0.249212000  |
| C | 1.382451000   | -0.871884000 | -0.766526000 |
| C | 2.766639000   | -0.986228000 | -0.841435000 |
| H | 3.049403000   | 4.398364000  | -0.545782000 |
| H | 5.228566000   | 5.590014000  | -0.581858000 |
| H | 7.348795000   | 4.323840000  | -0.773475000 |
| H | 7.347211000   | 1.847339000  | -0.916339000 |
| H | 5.042448000   | -1.487019000 | -2.780466000 |
| H | 6.719165000   | -3.320952000 | -2.923727000 |
| H | 8.516624000   | -3.501001000 | -1.236715000 |
| H | 8.886858000   | -4.074391000 | 1.010707000  |
| H | 10.673757000  | -4.260040000 | 2.703421000  |
| H | 11.718765000  | -2.209502000 | 3.650706000  |
| H | 10.962360000  | 0.028281000  | 2.866761000  |

|   |               |              |              |
|---|---------------|--------------|--------------|
| H | 9.201808000   | 0.211901000  | 1.147532000  |
| H | 6.883289000   | -0.103252000 | 0.838598000  |
| H | 1.024448000   | 2.513943000  | -0.587818000 |
| H | -1.074514000  | -1.120483000 | -2.037944000 |
| H | -3.538674000  | -1.053694000 | -1.940529000 |
| H | -2.562727000  | 3.600131000  | 2.301760000  |
| H | -4.580738000  | 4.664675000  | 3.283568000  |
| H | -6.845698000  | 3.936925000  | 2.593617000  |
| H | -7.150705000  | 2.123713000  | 0.928324000  |
| H | -6.814554000  | -0.525995000 | 1.016211000  |
| H | -9.046206000  | -0.361949000 | 1.747549000  |
| H | -10.705114000 | -1.499432000 | 3.177645000  |
| H | -11.683739000 | -3.676278000 | 2.471687000  |
| H | -10.963357000 | -4.707581000 | 0.324396000  |
| H | -9.276284000  | -3.587315000 | -1.086695000 |
| H | -8.974643000  | -1.745882000 | -2.500084000 |
| H | -7.279265000  | -0.635039000 | -3.914326000 |
| H | -5.387400000  | 0.600242000  | -2.869235000 |
| H | -0.785661000  | 2.024613000  | 0.883035000  |
| H | 0.784051000   | -1.778274000 | -0.752455000 |
| H | 3.239429000   | -1.961353000 | -0.896465000 |
